# Supplementary material for: Synthesis of CoFe2O4nanowire in carbon nanotubes. A new use of the confinement effect
Source: Royal Society of Chemistry journal article supplement (doi:10.1039/b203787b), 2002-01-01
Supplement: b203787b1.doc [file b203787b1.doc]

0

20

40

60

80

100

Intensity

(au)

Two-Theta Angle (deg.)

**Co-Fe nitrate on**

****

**-SiC after air treatment at 100oC**

X-Ray-Diffraction

Fe source (0,1789nm)

time scan: 15s

step scan: 0.030o



-SiC



-SiC
