# Supplementary material for: Synthesis of CoFe2O4nanowire in carbon nanotubes. A new use of the confinement effect
Source: Royal Society of Chemistry journal article supplement (doi:10.1039/b203787b), 2002-01-01
Supplement: b203787b2.doc [file b203787b2.doc]

Supplementary Material (ESI) for Chemical Communications

This journal is © The Royal Society of Chemistry 2002

0

20

40

60

80

100

Intensity (au)

Two-Theta Angle (deg.)

**CoFe**

**2**

**O**

**4**

**-MWNTs after air treatment at 100oC**

X-Ray-Diffraction

MWNTs

MWNTs

Fe source (0,1789nm)

time scan: 15s

step scan: 0.030o
