# Supplementary material for: Synthesis of CoFe2O4nanowire in carbon nanotubes. A new use of the confinement effect
Source: Royal Society of Chemistry journal article supplement (doi:10.1039/b203787b), 2002-01-01
Supplement: b203787b3.doc [file b203787b3.doc]

Supplementary Material (ESI) for Chemical Communications

This journal is © The Royal Society of Chemistry 2002
